# Supplementary material for: hicap: In Silico Serotyping of the Haemophilus influenzae Capsule Locus
Source: PubMed Central journal article supplement (PMC6535587; doi:10.1128/jcm.00190-19), 2019-05-24

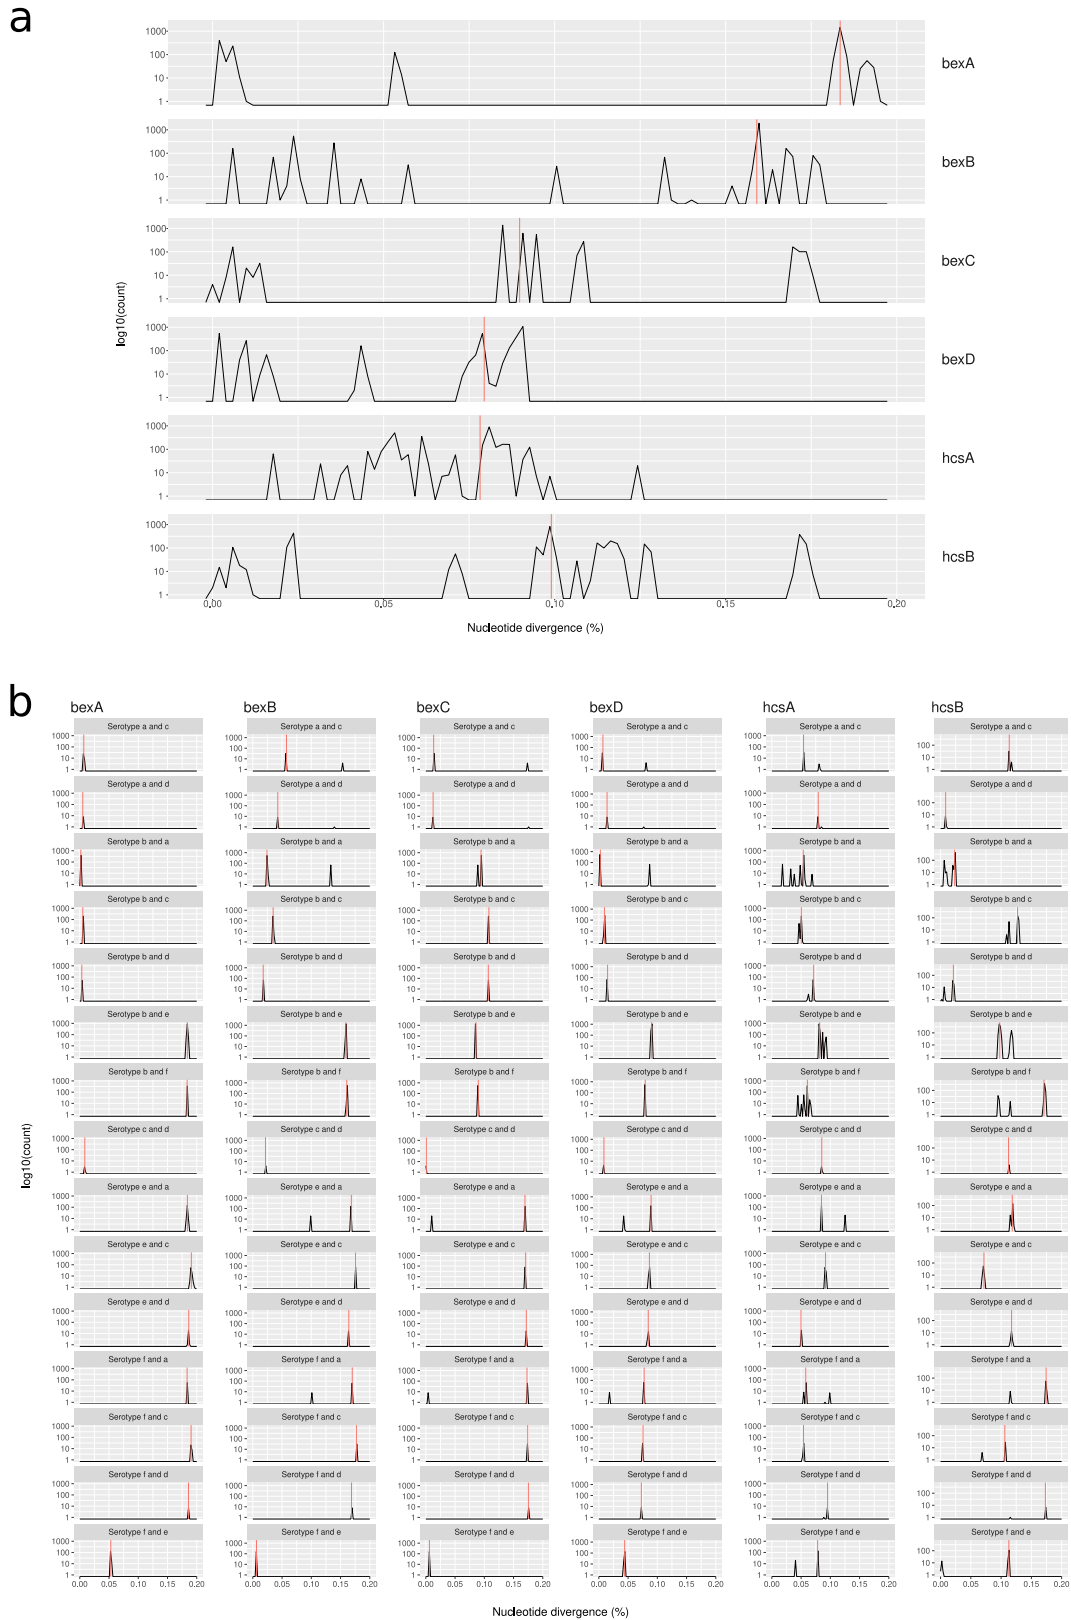

Supplement: JCM.00190-19-s0001.pdf [file JCM.00190-19-s0001.pdf]
